# Supplementary material for: The efficacy and safety of roxadustat for the treatment of anemia in non-dialysis dependent chronic kidney disease patients: An updated systematic review and meta-analysis of randomized clinical trials
Source: PLoS One. 2022 Apr 1;17(4):e0266243. doi: 10.1371/journal.pone.0266243 (PMC8974992; doi:10.1371/journal.pone.0266243)
Supplement: S7 Fig — (DOCX) [file pone.0266243.s008.docx]

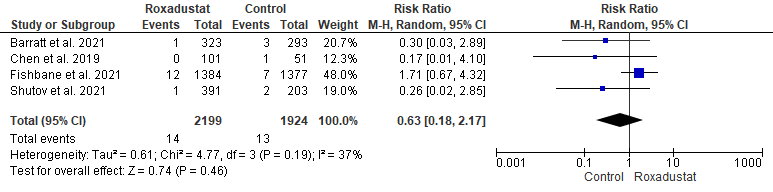


Figure S7 Forest plot of comparison: 4 Cardiovascular side effects, outcome: 4.5 Coronary artery disease.

CI: confidence interval; M-H: Mantel-Haenszel; df: degrees of freedom; I2, I-squared.
